# Supplementary material for: Multi-response optimization followed by multivariate calibration for simultaneous determination of carcinogenic polycyclic aromatic hydrocarbons in environmental samples using gold nanoparticles
Source: Royal Society of Chemistry journal article supplement (doi:10.1039/c6ra18415d), 2016-01-01
Supplement: c6ra18415d1.pdf [file c6ra18415d1.pdf]

## Supporting Information

### **Multiresponse optimization followed by multivariate calibration for simultaneous determination of carcinogenic polycyclic aromatic hydrocarbons in environmental samples using gold nanoparticles**

Mahsa Rezaian, Hadi Parastar\*, M. Reza Hormozi-Nezhad

*Department of Chemistry, Sharif University of Technology, P.O. Box 11155-3516, Tehran,*

*Iran*

\* Author to whom correspondence should be addressed;

Tel.: +98- 21- 66165306; fax: +98- 21- 66005718 (Hadi Parastar)

E-mail: [h.parastar@sharif.edu](mailto:h.parastar@sharif.edu), [h.parastar@gmail.com](mailto:h.parastar@gmail.com)

Table S1 – ANOVA table for quadratic response surface for Aceny

| <b>Source</b>   | <b>SS</b> | <b>df</b> | <b>MS</b> | <b>F</b> | <b>p-value</b> |                 |
|-----------------|-----------|-----------|-----------|----------|----------------|-----------------|
| Block           | 0.00046   | 1         | 0.00046   | 0.03511  | 0.8527         | Not significant |
| Model           | 0.434502  | 6         | 0.072417  | 5.535891 | 0.0007         | Significant     |
| A               | 0.17512   | 1         | 0.17512   | 13.38701 | 0.0010         |                 |
| D               | 0.055615  | 1         | 0.055615  | 4.251471 | 0.0486         |                 |
| E               | 0.044719  | 1         | 0.044719  | 3.418508 | 0.0751         |                 |
| AE              | 0.050971  | 1         | 0.050971  | 3.896472 | 0.0583         |                 |
| CD              | 0.068927  | 1         | 0.068927  | 5.269141 | 0.0294         |                 |
| A <sup>2</sup>  | 0.039149  | 1         | 0.039149  | 2.992739 | 0.0946         |                 |
| Residual        | 0.366278  | 28        | 0.013081  |          |                |                 |
| Lack of Fit     | 0.26645   | 20        | 0.013322  | 1.067635 | 0.4910         | Not significant |
| Pure Error      | 0.099828  | 8         | 0.012478  |          |                |                 |
| Corrected Total | 0.801239  | 35        |           |          |                |                 |

Table S2 - ANOVA table for quadratic response surface for Flu

| <b>Source</b>   | <b>SS</b> | <b>df</b> | <b>MS</b> | <b>F</b> | <b>p-value</b> |                 |
|-----------------|-----------|-----------|-----------|----------|----------------|-----------------|
| Block           | 9.84E-03  | 1         | 9.84E-03  | 4.41     | 0.0460         | Significant     |
| Model           | 0.19      | 9         | 0.021     | 9.38     | < 0.0001       | Significant     |
| A               | 9.54E-03  | 1         | 9.54E-03  | 4.27     | 0.0493         |                 |
| C               | 0.043     | 1         | 0.043     | 19.06    | 0.0002         |                 |
| AC              | 0.011     | 1         | 0.011     | 4.83     | 0.0374         |                 |
| AD              | 9.70E-03  | 1         | 9.70E-03  | 4.34     | 0.0475         |                 |
| BC              | 0.028     | 1         | 0.028     | 12.37    | 0.0017         |                 |
| BD              | 0.016     | 1         | 0.016     | 7.37     | 0.0119         |                 |
| CD              | 0.031     | 1         | 0.031     | 13.66    | 0.0011         |                 |
| CE              | 0.034     | 1         | 0.034     | 15.29    | 0.0006         |                 |
| DE              | 7.11E-03  | 1         | 7.11E-03  | 3.18     | 0.0866         |                 |
| Residual        | 0.056     | 25        | 2.23E-03  |          |                |                 |
| Lack of Fit     | 0.043     | 17        | 2.55E-03  | 1.62     | 0.2489         | Not significant |
| Pure Error      | 0.013     | 8         | 1.57E-03  |          |                |                 |
| Corrected Total | 0.25      | 35        |           |          |                |                 |

Table S3- ANOVA table for quadratic response surface for Ant

| <b>Source</b>   | <b>SS</b> | <b>df</b> | <b>MS</b> | <b>F</b> | <b>p-value</b> |                 |
|-----------------|-----------|-----------|-----------|----------|----------------|-----------------|
| Block           | 0.08      | 1         | 0.08      | 4.21     | 0.050          | Significant     |
| Model           | 0.51      | 7         | 0.072     | 3.85     | 0.005          | significant     |
| C               | 0.068     | 1         | 0.068     | 3.65     | 0.0668         |                 |
| E               | 0.067     | 1         | 0.067     | 3.55     | 0.0705         |                 |
| AB              | 0.097     | 1         | 0.097     | 5.15     | 0.0315         |                 |
| CD              | 0.057     | 1         | 0.057     | 3.03     | 0.0931         |                 |
| DE              | 0.078     | 1         | 0.078     | 4.18     | 0.0506         |                 |
| B <sup>2</sup>  | 0.061     | 1         | 0.061     | 3.25     | 0.0824         |                 |
| C <sup>2</sup>  | 0.078     | 1         | 0.078     | 4.17     | 0.0511         |                 |
| Residual        | 0.51      | 27        | 0.019     |          |                |                 |
| Lack of Fit     | 0.27      | 19        | 0.014     | 0.47     | 0.9182         | not significant |
| Pure Error      | 0.24      | 8         | 0.03      |          |                |                 |
| Corrected Total | 1.09      | 35        |           |          |                |                 |

Table S4- ANOVA table for quadratic response surface for B[a]A

| <b>Source</b>   | <b>SS</b> | <b>df</b> | <b>MS</b> | <b>F</b> | <b>P-value</b> |                 |
|-----------------|-----------|-----------|-----------|----------|----------------|-----------------|
| Block           | 0.023     | 1         | 0.023     | 0.621    | 0.4371         | Not significant |
| Model           | 1.33E+00  | 5         | 0.27      | 7.27     | 0.0002         | significant     |
| C               | 4.10E-01  | 1         | 0.41      | 11.06    | 0.0024         |                 |
| D               | 1.40E-01  | 1         | 0.14      | 3.94     | 0.0567         |                 |
| AC              | 2.20E-01  | 1         | 0.22      | 5.94     | 0.0212         |                 |
| A <sup>2</sup>  | 0.34      | 1         | 0.34      | 9.3      | 0.0049         |                 |
| E <sup>2</sup>  | 0.22      | 1         | 0.22      | 6.09     | 0.0198         |                 |
| Residual        | 1.06      | 29        | 0.037     |          |                |                 |
| Lack of Fit     | 0.8       | 21        | 0.038     | 1.16     | 0.4365         | not significant |
| Pure Error      | 0.26      | 8         | 0.033     |          |                |                 |
| Corrected Total | 2.42      | 35        |           |          |                |                 |

Table S5- ANOVA table for quadratic response surface for Chr

| <b>Source</b>   | <b>SS</b> | <b>df</b> | <b>MS</b> | <b>F</b> | <b>p-value</b> |                 |
|-----------------|-----------|-----------|-----------|----------|----------------|-----------------|
| Block           | 0.21      | 1         | 0.21      | 28.79    | 0.0001         | Significant     |
| Model           | 0.75      | 7         | 0.11      | 14.72    | < 0.0001       | significant     |
| A               | 0.19      | 1         | 0.19      | 25.82    | < 0.0001       |                 |
| C               | 0.033     | 1         | 0.033     | 4.53     | 0.0426         |                 |
| D               | 0.04      | 1         | 0.04      | 5.55     | 0.026          |                 |
| AC              | 0.084     | 1         | 0.084     | 11.51    | 0.0022         |                 |
| BE              | 0.075     | 1         | 0.075     | 10.23    | 0.0035         |                 |
| D <sup>2</sup>  | 0.26      | 1         | 0.26      | 35.85    | < 0.0001       |                 |
| E <sup>2</sup>  | 0.07      | 1         | 0.07      | 9.58     | 0.0045         |                 |
| Residual        | 0.2       | 27        | 7.30E-03  |          |                |                 |
| Lack of Fit     | 0.16      | 19        | 8.64E-03  | 2.1      | 0.1419         | not significant |
| Pure Error      | 0.033     | 8         | 4.11E-03  |          |                |                 |
| Corrected Total | 1.16      | 35        |           |          |                |                 |

Table S6- ANOVA table for quadratic response surface for B[b]F

| Source          | SS    | df | MS    | F     | p-value |                 |
|-----------------|-------|----|-------|-------|---------|-----------------|
| Block           | 0.027 | 1  | 0.027 | 1.59  | 0.2164  | Not significant |
| Model           | 0.26  | 2  | 0.13  | 7.69  | 0.0019  | significant     |
| A               | 0.19  | 1  | 0.19  | 11.26 | 0.0021  |                 |
| AE              | 0.07  | 1  | 0.07  | 4.13  | 0.0506  |                 |
| Residual        | 0.55  | 32 | 0.017 |       |         |                 |
| Lack of Fit     | 0.32  | 24 | 0.013 | 0.48  | 0.9187  | not significant |
| Pure Error      | 0.22  | 8  | 0.028 |       |         |                 |
| Corrected Total | 0.84  | 35 |       |       |         |                 |

Table S7- ANOVA table for quadratic response surface for B[k]F

| <b>Source</b>   | <b>SS</b> | <b>df</b> | <b>MS</b> | <b>F</b> | <b>p-value</b> |                 |
|-----------------|-----------|-----------|-----------|----------|----------------|-----------------|
| Block           | 3.45E-03  | 1         | 3.45E-03  | 1.92     | 0.1761         | Not significant |
| Model           | 0.54      | 4         | 0.13      | 7.47     | 0.0003         | significant     |
| A               | 0.21      | 1         | 0.21      | 11.92    | 0.0017         |                 |
| B               | 0.079     | 1         | 0.079     | 4.41     | 0.0442         |                 |
| A <sup>2</sup>  | 0.12      | 1         | 0.12      | 6.69     | 0.0148         |                 |
| E <sup>2</sup>  | 0.12      | 1         | 0.12      | 6.88     | 0.0136         |                 |
| Residual        | 0.54      | 30        | 0.018     |          |                |                 |
| Lack of Fit     | 0.43      | 22        | 0.02      | 1.5      | 0.2846         | not significant |
| Pure Error      | 0.1       | 8         | 0.013     |          |                |                 |
| Corrected Total | 1.08      | 35        |           |          |                |                 |



Table S8- ANOVA table for quadratic response surface for B[a]P

| <b>Source</b>   | <b>SS</b> | <b>df</b> | <b>MS</b> | <b>F</b> | <b>p-value</b> |                 |
|-----------------|-----------|-----------|-----------|----------|----------------|-----------------|
| Block           | 0.023     | 1         | 0.023     | 2.09     | 0.1598         | Not significant |
| Model           | 0.75      | 7         | 0.11      | 9.85     | < 0.0001       | significant     |
| A               | 0.37      | 1         | 0.37      | 33.61    | < 0.0001       |                 |
| B               | 0.044     | 1         | 0.044     | 4.04     | 0.0546         |                 |
| AC              | 0.054     | 1         | 0.054     | 4.97     | 0.0343         |                 |
| AE              | 0.037     | 1         | 0.037     | 3.41     | 0.0758         |                 |
| CE              | 0.047     | 1         | 0.047     | 4.34     | 0.0468         |                 |
| DE              | 0.045     | 1         | 0.045     | 4.17     | 0.0509         |                 |
| A <sup>2</sup>  | 0.16      | 1         | 0.16      | 14.37    | 0.0008         |                 |
| Residual        | 0.29      | 27        | 0.011     |          |                |                 |
| Lack of Fit     | 0.23      | 19        | 0.012     | 1.47     | 0.2963         | not significant |
| Pure Error      | 0.065     | 8         | 8.18E-03  |          |                |                 |
| Corrected Total | 1.07      | 35        |           |          |                |                 |

Table S9 - ANOVA table for quadratic response surface for I[123-cd]P

| <b>Source</b>   | <b>SS</b> | <b>df</b> | <b>MS</b> | <b>F</b> | <b>p-value</b> |                 |
|-----------------|-----------|-----------|-----------|----------|----------------|-----------------|
| Block           | 0.33      | 1         | 0.33      | 8.25     | 0.0073         | significant     |
| Model           | 0.81      | 3         | 0.27      | 6.75     | 0.0012         | significant     |
| A               | 0.35      | 1         | 0.35      | 8.82     | 0.0057         |                 |
| AE              | 0.27      | 1         | 0.27      | 6.64     | 0.015          |                 |
| B <sup>2</sup>  | 0.19      | 1         | 0.19      | 4.79     | 0.0362         |                 |
| Residual        | 1.24      | 31        | 0.04      |          |                |                 |
| Lack of Fit     | 0.71      | 23        | 0.031     | 0.46     | 0.9298         | not significant |
| Pure Error      | 0.53      | 8         | 0.067     |          |                |                 |
| Corrected Total | 2.37      | 35        |           |          |                |                 |

Table S10- ANOVA table for quadratic response surface for D[ah]A

| <b>Source</b>   | <b>SS</b> | <b>df</b> | <b>MS</b> | <b>F</b> | <b>p-value</b> |                 |
|-----------------|-----------|-----------|-----------|----------|----------------|-----------------|
| Block           | 2.74E-03  | 1         | 2.74E-03  | 2.98     | 0.0957         | Not significant |
| Model           | 0.059     | 7         | 8.41E-03  | 9.15     | < 0.0001       | significant     |
| A               | 0.016     | 1         | 0.016     | 16.93    | 0.0003         |                 |
| B               | 8.72E-03  | 1         | 8.72E-03  | 9.49     | 0.0047         |                 |
| AE              | 0.012     | 1         | 0.012     | 12.72    | 0.0014         |                 |
| DE              | 4.63E-03  | 1         | 4.63E-03  | 5.04     | 0.0331         |                 |
| A <sup>2</sup>  | 4.70E-03  | 1         | 4.70E-03  | 5.11     | 0.032          |                 |
| B <sup>2</sup>  | 0.01      | 1         | 0.01      | 11.14    | 0.0025         |                 |
| E <sup>2</sup>  | 3.30E-03  | 1         | 3.30E-03  | 3.59     | 0.0689         |                 |
| Residual        | 0.025     | 27        | 9.19E-04  |          |                |                 |
| Lack of Fit     | 0.019     | 19        | 1.01E-03  | 1.46     | 0.3017         | not significant |
| Pure Error      | 5.57E-03  | 8         | 6.96E-04  |          |                |                 |
| Corrected Total | 0.086     | 35        |           |          |                |                 |

Table S11- ANOVA table for quadratic response surface for B[ghi]P

| <b>Source</b>   | <b>SS</b> | <b>df</b> | <b>MS</b> | <b>F</b> | <b>p-value</b> |                 |
|-----------------|-----------|-----------|-----------|----------|----------------|-----------------|
| Block           | 0.12      | 1         | 0.12      | 6.00     | 0.0206         | significant     |
| Model           | 0.86      | 5         | 0.17      | 8.44     | < 0.0001       | significant     |
| A               | 0.36      | 1         | 0.36      | 17.89    | 0.0002         |                 |
| B               | 0.074     | 1         | 0.074     | 3.62     | 0.0669         |                 |
| AE              | 0.21      | 1         | 0.21      | 10.44    | 0.0031         |                 |
| A <sup>2</sup>  | 0.098     | 1         | 0.098     | 4.8      | 0.0367         |                 |
| B <sup>2</sup>  | 0.11      | 1         | 0.11      | 5.43     | 0.0269         |                 |
| Residual        | 0.59      | 29        | 0.02      |          |                |                 |
| Lack of Fit     | 0.48      | 21        | 0.023     | 1.57     | 0.2628         | not significant |
| Pure Error      | 0.12      | 8         | 0.014     |          |                |                 |
| Corrected Total | 1.57      | 35        |           |          |                |                 |
